# Supplementary material
Source: PubMed Central journal article supplement (PMC2863237)

## Supplemental Figure S1

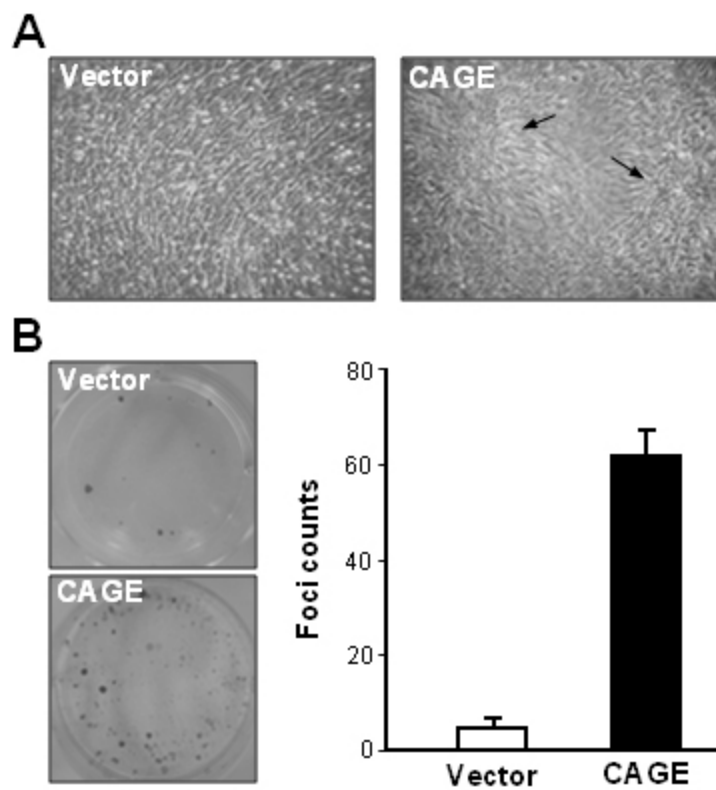

Supplement: supp_M109.084400_jbc.M109.084400-2.pdf [file supp_M109.084400_jbc.M109.084400-2.pdf]
